# Supplementary material for: Unique Tubulin-Based Structures in the Zoonotic Apicomplexan Parasite Cryptosporidium parvum
Source: MDPI journal article supplement (doi:10.3390/microorganisms9091921), 2021-09-10
Supplement: s1 [file s1]

**A**

| Taxonomic group     | Tubulin subunit |      |       |
|---------------------|-----------------|------|-------|
|                     | Alpha           | Beta | Gamma |
| Cryptosporidia      | 1               | 1    | 1     |
| Intestinal coccidia | 1               | 1-2  | 1     |
| Cystic coccidia     | 3               | 2    | 1     |
| Plasmodia           | 2               | 1    | 1     |
| Piroplasmids        | 2               | 1    | 1     |
| Gregarina           | 2               | 2    | 1     |

**B**

Posterior probability = 1.0

**Alpha**

**Beta**

**Gamma**

**A)** Number of isoforms of individual tubulin subunits identified from the genomes of major taxonomic groups of apicomplexans. **B)** Consensus tree inferred from  $\alpha$ -,  $\beta$ - and  $\gamma$ -tubulin proteins from representative apicomplexan species by Bayesian inference using a mixed model for amino acid substitution rates with the consideration of invariable sites and four rates of gamma-distribution across the sites (arithmetic mean of log likelihood = -15257.76). Tree was rooted using  $\gamma$ -Tubulin sequences as the outgroup. Posterior analysis showed that Jones amino acid substitution model was the most fit model with 100% posterior probability. Numbers at the major nodes indicate proportion support by posterior probability, in which nodes with 100% support were indicated by black round dots. Some species names are colored for better visualization and comparison. Bar indicates amino acid substitution rate.
